# Supplementary material
Source: publisher figshare collection journal article supplement (https://tandf.figshare.com/ndownloader/files/20960595)
Supplement: Supplementary file 1 [file 20960595]

## SUPPLEMENTARY MATERIAL

### **A new sesquiterpenoid and further natural products from *Taraxacum portentosum* Kirschner & Štěpánek, an endangered species**

Klaudia Michalska<sup>a,\*</sup>, Jolanta Marciniuk<sup>b</sup>, Anna Stojakowska<sup>a</sup>

<sup>a</sup> *Maj Institute of Pharmacology, Polish Academy of Sciences, Department of Phytochemistry, 31-343 Kraków, 12 Smętna street, Poland*

<sup>b</sup> *Department of Botany, University of Podlasie, 08-110 Siedlce, 12 Prusa street, Poland*

\*Corresponding author. Tel.: +48 12 6623257; fax: +48 12 6374500.

E-mail address: klaudiaz@if-pan.krakow.pl (K. Michalska)

The chemical studies of roots and aerial parts of *Taraxacum portentosum* Kirschner & Štěpánek, a member of the section Palustria (H. Lindb.) Dahlst. (Asteraceae), led to the isolation of one new eudesmanolide and 13 known compounds, including five sesquiterpenoids: taraxinic acid, 11 $\beta$ ,13-dihydrataraxinic acid, taraxinic acid  $\beta$ -glucopyranosyl ester and its 11 $\beta$ ,13-dihydroderivative, ixerin D, one apocarotenoid – loliolide and seven phenolics: scopoletin, 3-hydroxy-1-(4-hydroxy-3-methoxyphenyl)-1-propanone, methyl *p*-hydroxyphenylacetate, 5-methoxy-eugenyl-4-*O*- $\beta$ -glucopyranoside, syringin, dihydroconiferin, and dihydrosyringin. Their structures were established by <sup>1</sup>H NMR. The new compound was characterized as 3-oxo-4 $\beta$ *H*-11,13-eudesmen-12,6-olide-8-*O*- $\beta$ -glucopyranoside based on spectroscopic data (1D and 2D NMR) and HRESI mass spectrometry.

Keywords: Asteraceae; Palustria; Phenolic compounds; Sesquiterpenoids; *Taraxacum portentosum*

### 3. Experimental

#### 3.1. General experimental procedures

HRESI mass spectra were obtained in the positive ion mode using Maldi-Synapt G2-S HDMS mass spectrometer equipped with an electrospray ion source and q-TOF type mass analyzer. All NMR spectra were recorded in  $\text{CDCl}_3$  and in pyridine- $d_5$  on a Bruker AVANCE III 400 (400.17 MHz for  $^1\text{H}$  and 100.63 MHz for  $^{13}\text{C}$ ) and a Bruker AVANCE III 600 (600.20 MHz for  $^1\text{H}$ ). The lock signal of solvent was used as an internal standard. Optical rotation was determined in MeOH on a PolAAr31 polarimeter with a sodium lamp operating at 589.44 nm.

Column chromatography was carried out using Merck silica gel 60 (0.063 - 0.2 mm). TLC was performed on Merck silica gel 60 (0.25 mm) plates and compounds were detected by viewing under UV light as well as by spraying with 20% sulfuric acid and heating. Analytical HPLC was carried out on a LiChroCART RP-18e column (particle size 5  $\mu\text{m}$ , 3 x 125 mm) (Merck) eluted with  $\text{H}_2\text{O}$ -MeOH mixtures at a flow rate of 0.5  $\text{ml min}^{-1}$ . Semipreparative HPLC was performed on a Waters instrument coupled to a dual wavelength UV/VIS detector operating at 210 and 260 nm, using Delta-Pak C-18 column (particle size 15  $\mu\text{m}$ , 25 x 100 mm) (Waters Corp.) eluted with  $\text{H}_2\text{O}$ -MeOH mixtures at a flow rate of 3.0  $\text{ml min}^{-1}$ . All solvents of analytical grade ( $\text{CHCl}_3$ , EtOAc, MeOH) were supplied by POCh S.A, and methanol for liquid chromatography and n-hexane were obtained from Merck. Water was purified by Milli-Q Compact Range system (Millipore Corp.).

#### 3.2. Plant material

The roots and aerial parts of *T. portentosum* were collected in their natural habitat: Krzeřlin (E Polska, geographical coordinates: 52°13'19"N, 22°21'28"E) – wet meadows and lowmoors in the Liwiec River valley on 10 May 2014, and identified by Jolanta Marciniuk. A voucher specimen (no 47531) was deposited at the herbarium of the Department of Botany, University of Podlasie in Siedlce (WSRP).

Morphologically, the species is marked with quite big (7,5-10,0 mm long and 2,0-3,5 mm wide) as well as wide bordered outer bracts. The leaf shape is also very distinctive with long and narrow interlobes and side lobes turned up on one side and turned down on the other side. *T. portentosum* is an apomictic tetraploid  $2n=4x=32$  (Marciniuk et al. 2010).

The phytochemical analysis was performed in the year of collection of the plant material.

#### 3.3. Extraction and isolation

The dried roots (92 g) and aerial parts (122 g) of the plant were separately powdered and extracted with EtOH at room temp. and the solvent was evaporated under reduced

pressure to give 13.0 g and 16.0 g of crude extracts, respectively. The crude extracts were chromatographed on a silica gel (Merck, Art. 7754) columns eluted with hexane-EtOAc (up to 100% EtOAc), followed by EtOAc-MeOH (up to 10% MeOH) gradient solvent systems. Further separation was conducted by prep. TLC and semiprep. HPLC.

Less polar fractions from the roots eluted with hexane-EtOAc (1:1, v/v) afforded **9** (1.2 mg), **2** and **3** in a mixture (*ca.* 1:1.5, 10.6 mg), after purification by semiprep. HPLC (H<sub>2</sub>O-MeOH, 1:1, v/v). Fractions from the EtOAc elution were separated by semiprep. HPLC (H<sub>2</sub>O-MeOH 3:2, v/v) to give **1** (1.5 mg), **10** (2.9 mg), **4** (13.0 mg), **5** (2.8 mg), and **11** (1.0 mg). More polar fractions eluted with EtOAc-MeOH (49:1, v/v) were processed by prep. TLC (CHCl<sub>3</sub>-MeOH, 17:3, v/v) and semiprep. HPLC (H<sub>2</sub>O-MeOH, 7:3, v/v) to yield **12** and **13** in a mixture (*ca.* 1:1.5, 2.5 mg), **12** (12.1 mg), **12** and **14** in a mixture (*ca.* 1:2, 1.9 mg) and **6** (3.4 mg).

The crude extract from the aerial parts was chromatographed, as described above, to give **1** (7.6 mg), **4** (12.1 mg), **5** (3.2 mg), **10** (11.5 mg), and **12** (11.8 mg). The elution of the silica gel column with hexane-EtOAc (3:2, v/v), followed by separation by semiprep. HPLC (H<sub>2</sub>O-MeOH, 3:2, v/v) afforded **7** (4.4 mg) and **8** (1.2 mg).

All compounds were characterized by direct comparison of their spectroscopic data (<sup>1</sup>H NMR) with those of the reference compounds previously isolated in our laboratory from the different *Taraxacum* species (**2–6**, **8–14**) (Kisiel and Michalska 2005, 2006; Michalska and Kisiel 2004; Michalska et al. 2010, 2019) and from *Lactuca tenerrima* (**7**) (Michalska et al. 2012).

### 3.3.1. 3-Oxo-4βH-11,13-eudesmen-12,6-olide-8-O-β-glucopyranoside (**1**)

Colourless solid:  $[\alpha]_D^{26}$  - 17.8° (c = 0.7, MeOH); <sup>1</sup>H- and <sup>13</sup>C NMR, HMBC: Table S1; ESIMS (pos. mode) *m/z*: 449.17 [M + Na]<sup>+</sup>; HRESIMS (pos. mode) *m/z*: 449.1761 [C<sub>21</sub>H<sub>30</sub>O<sub>9</sub>Na]<sup>+</sup>; calc. 449.1782.

## References

- Kisiel W, Michalska K. 2005. Sesquiterpenoids and phenolics from *Taraxacum hondoense*. *Fitoterapia*. 76:520–524.
- Kisiel W, Michalska K. 2006. Matricarin-type guaianolides from *Taraxacum bessarabicum* and their chemotaxonomic significance. *Biochem Syst Ecol*. 34:356–359.

- Marciniuk J, Rerak J, Grabowska-Joachimiak A, Jastrzab I, Musiał K, Joachimiak A. 2010. Chromosome numbers and stomatal cell length in *Taraxacum* sect. *Palustria* from Poland Acta Biol Cracov Series Botanica. 52:117–121.
- Michalska K, Kisiel W. 2004. Taxonomically significant guaianolides from *Taraxacum obovatum*. Biochem Syst Ecol. 32:765–768.
- Michalska K, Marciniuk J, Kisiel W. 2010. Sesquiterpenoids and phenolics from roots of *Taraxacum udum*. Fitoterapia. 81:434–436.
- Michalska K, Stojakowska A, Kisiel W. 2012. Phenolic constituents of *Lactuca tenerrima*. Biochem Syst Ecol. 42:32–34.
- Michalska K, Galanty A, Michalski O, Stojakowska A. 2019. Further sesquiterpenoids and phenolics from two species of *Taraxacum* F.H. Wigg. and cytotoxic activity of taraxinic acid and its derivatives. Phytochem Lett. 30:296–301.

### List of supporting information

**Table S1.**  $^1\text{H}$  NMR,  $^{13}\text{C}$  NMR, HMBC data of compound **1** in pyridine- $d_5$ .

**Figure S2.** Key NOESY correlations for **1**.

**Figure S3.**  $^1\text{H}$  NMR spectrum of compound **1**.

**Figure S4.**  $^{13}\text{C}$  NMR spectrum of compound **1**.

**Figure S5.** HR ESIMS spectrum of compound **1**.

**Figure S6.**  $^1\text{H}$ - $^1\text{H}$  COSY spectrum of compound **1**.

**Figure S7.** NOESY spectrum of compound **1**.

**Figure S8.** HSQC spectrum of compound **1**.

**Figure S9.** HMBC spectrum of compound **1**.

**Table S1.**  $^1\text{H}$  NMR (400.17 MHz) and  $^{13}\text{C}$  NMR (100.63 MHz) data of compound **1** in pyridine- $d_5$ .

| Position        | $\delta_{\text{H}}$ (ppm), $J$ (Hz) | $\delta_{\text{C}}$ (ppm) | HMBC (H $\rightarrow$ C)             |
|-----------------|-------------------------------------|---------------------------|--------------------------------------|
| Aglycone moiety |                                     |                           |                                      |
| 1 $\alpha$      | 1.64 br dd (12.4, 2.8)              | 20.97                     | -                                    |
| 1 $\beta$       | 1.32 ddd (12.4, 10.0, 3.2)          |                           | C-10                                 |
| 2 $\alpha$      | 1.44 <sup>a</sup> m                 | 36.55                     | C-10, C-14, C-15                     |
| 2 $\beta$       | 2.33 <sup>b</sup> m                 |                           | -                                    |
| 3               | -                                   | 207.71                    | -                                    |
| 4               | 2.52 dq (12.0, 6.4)                 | 44.27                     | C-3, C-5, C-6, C-15                  |
| 5               | 1.46 <sup>a</sup> dd (11.6, 11.2)   | 50.21                     | C-4, C-6, C-7, C-8, C-10, C-14, C-15 |
| 6               | 3.87 dd (10.8, 10.8)                | 82.79                     | C-4, C-11                            |
| 7               | 2.34 <sup>b</sup> br d (13.6)       | 50.37                     | C-5                                  |
| 8               | 3.96 m                              | 81.66                     | C-2, C-10, C-14, C-1'                |
| 9 $\alpha$      | 3.19 dd (15.2, 5.6)                 | 43.85                     | C-3, C-4, C-8, C-10                  |
| 9 $\beta$       | 2.80 dd (14.8, 11.2)                |                           | C-3, C-8                             |
| 10              | -                                   | 41.49                     | -                                    |
| 11              | -                                   | 139.45                    | -                                    |
| 12              | -                                   | 170.04                    | -                                    |
| 13a             | 5.27 d (2.8)                        | 116.51                    | C-7, C-12                            |
| 13b             | 6.09 d (3.2)                        |                           | C-7, C-11, C-12                      |
| 14              | 1.09 s                              | 12.51                     | C-2, C-5, C-8, C-10                  |
| 15              | 1.38 d (6.4)                        | 13.84                     | C-3, C-4, C-5                        |
| Glucosyl moiety |                                     |                           |                                      |
| 1'              | 4.80 d (7.6)                        | 102.20                    | C-8, C-3'                            |
| 2'              | 3.99 dd (8.4, 7.6)                  | 74.83                     | C-1', C-3'                           |
| 3'              | 4.23 <sup>c</sup> m                 | 78.36                     | C-2', C-4'                           |
| 4'              | 4.20 <sup>c</sup> m                 | 71.60                     | C-3', C-5', C-6'a                    |
| 5'              | 3.95 m                              | 78.39                     | -                                    |
| 6'a             | 4.39 dd (11.6, 6.0)                 | 62.86                     | C-4', C-5'                           |
| 6'b             | 4.61 dd (11.6, 2.4)                 |                           | C-4'                                 |

<sup>a,b,c</sup> Signals overlapped.

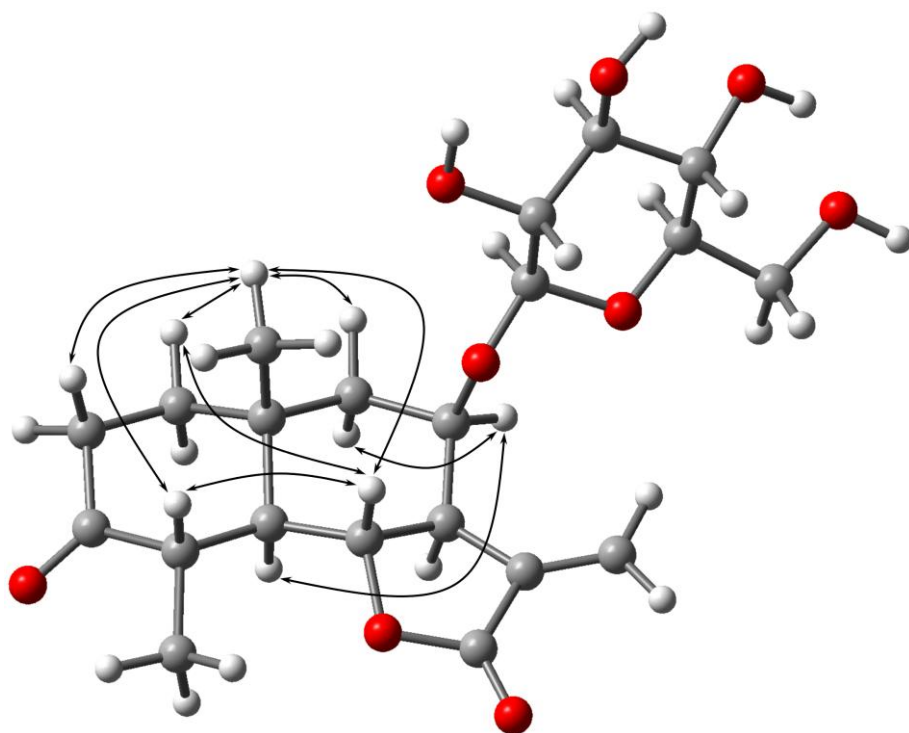

**Figure S2.** Key NOESY correlations for **1**.

Jagiellonskie Centrum Innowacji  
Pracownia NMR  
Probka: TPn8

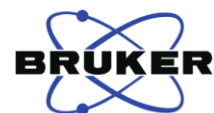

Current Data Parameters  
NAME 18-01-26-tpn8  
EXPNO 55  
PROCNO 1

F2 - Acquisition Parameters  
Date\_ 20180129  
Time 0.20 h  
INSTRUM spect  
PROBHD Z108618\_0682 (  
PULPROG zg30  
TD 32050  
SOLVENT Pyr  
NS 80  
DS 0  
SWH 6410.256 Hz  
FIDRES 0.400016 Hz  
AQ 2.4999001 sec  
RG 140.97  
DW 78.000 usec  
DE 6.50 usec  
TE 298.1 K  
D1 1.00000000 sec  
TD0 1  
SF01 400.1728012 MHz  
NUC1 1H  
P1 15.25 usec  
PLW1 11.30000019 W

F2 - Processing parameters  
SI 65536  
SF 400.1700000 MHz  
WDW EM  
SSB 0  
LB 0.10 Hz  
GB 0  
PC 1.00

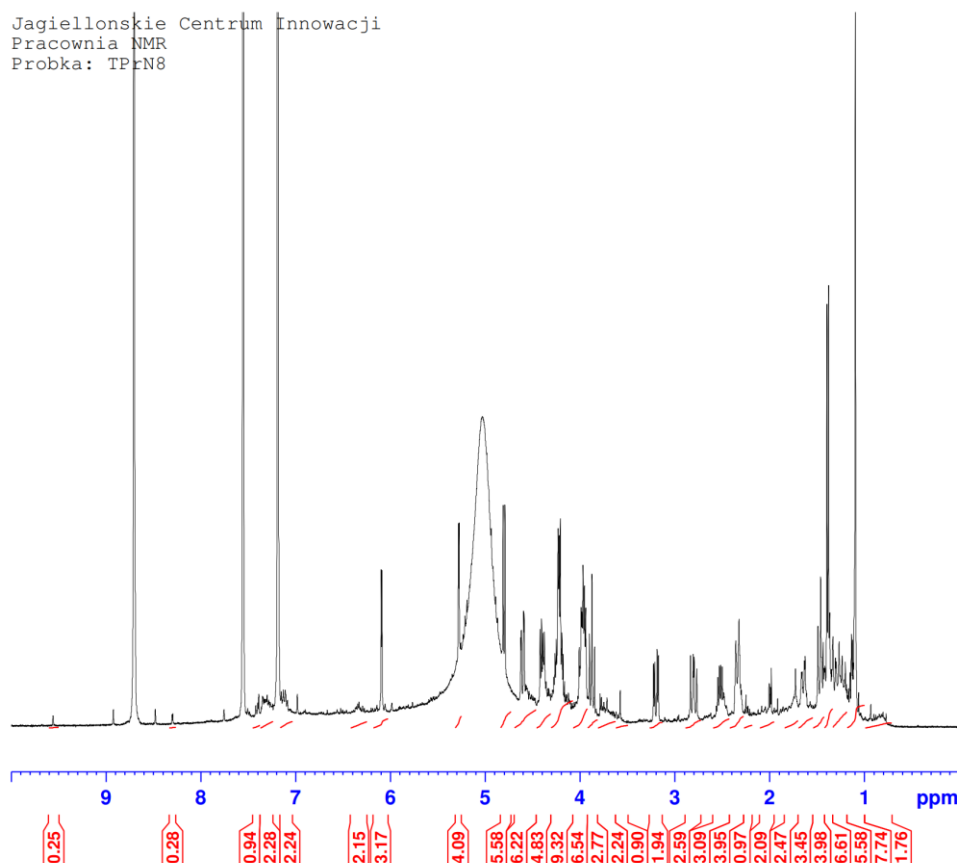

Figure S3.  $^1\text{H}$  NMR spectrum of compound **1**.



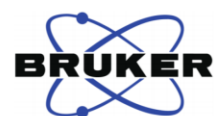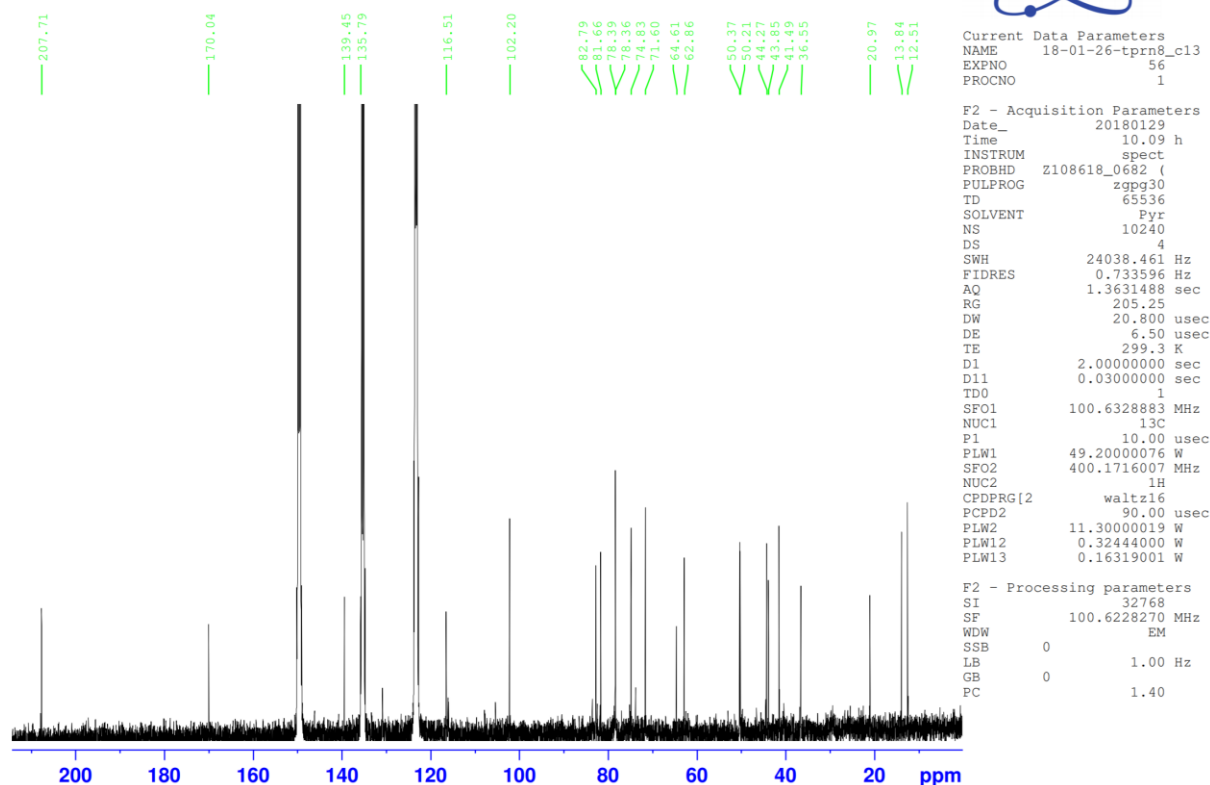

Figure S4.  $^{13}\text{C}$  NMR spectrum of compound 1.

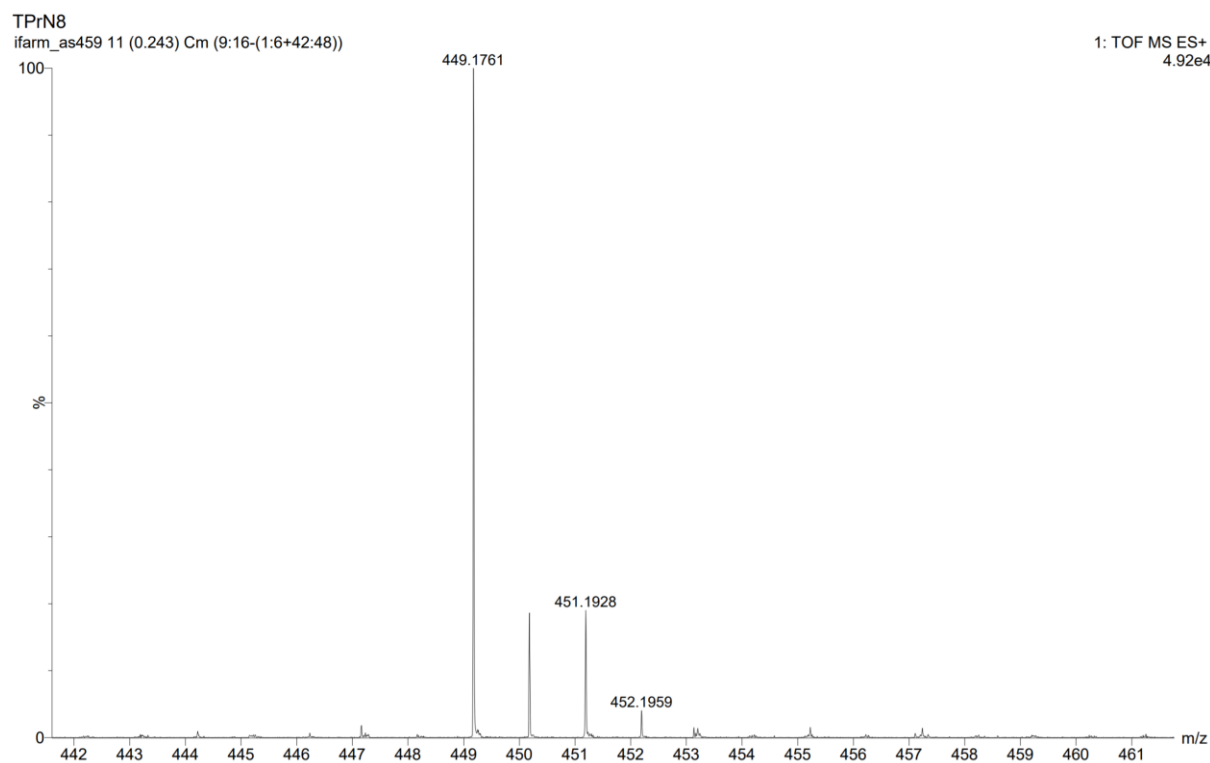

Figure S5. HR ESIMS spectrum of compound 1.

Jagiellonskie Centrum Innowacji  
Pracownia NMR  
Probka: TPrN8

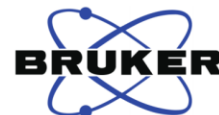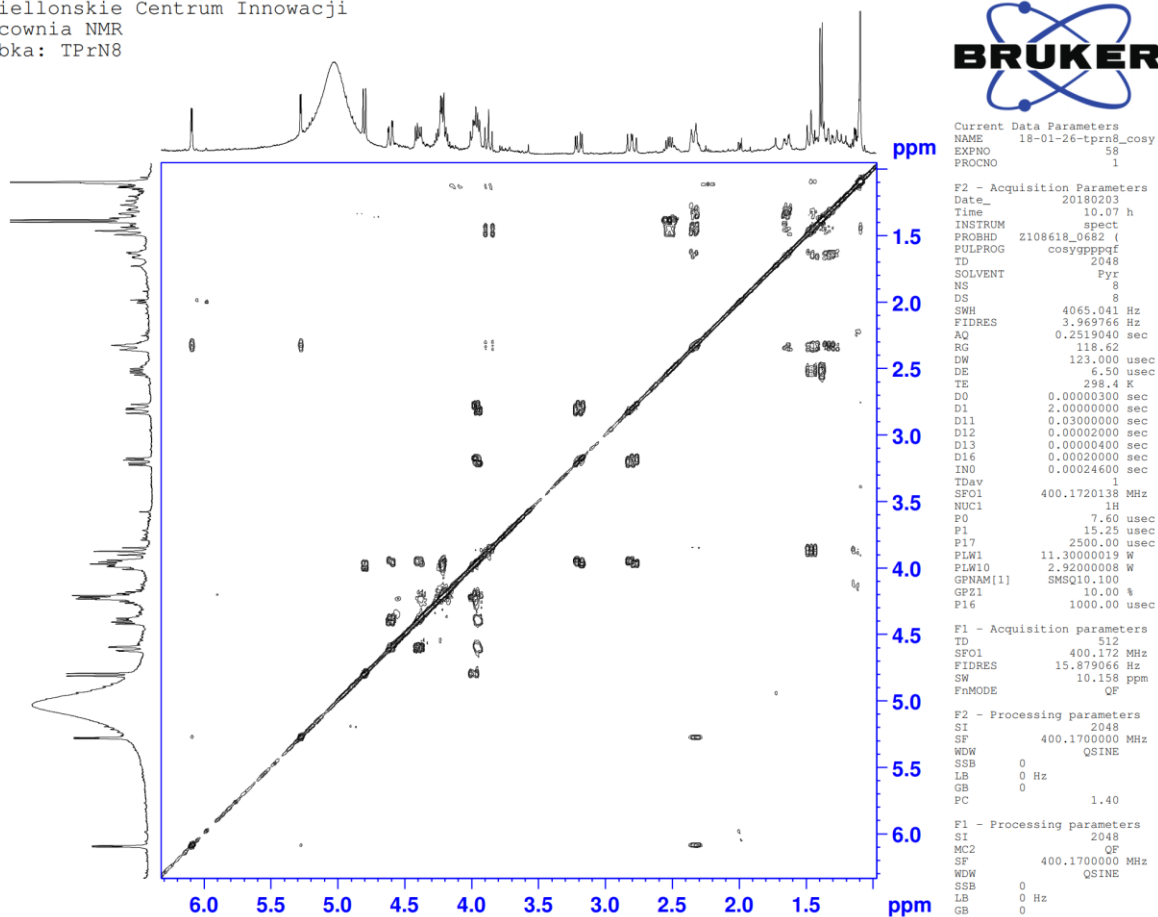

Figure S6.  $^1\text{H}$ - $^1\text{H}$  COSY spectrum of compound 1.

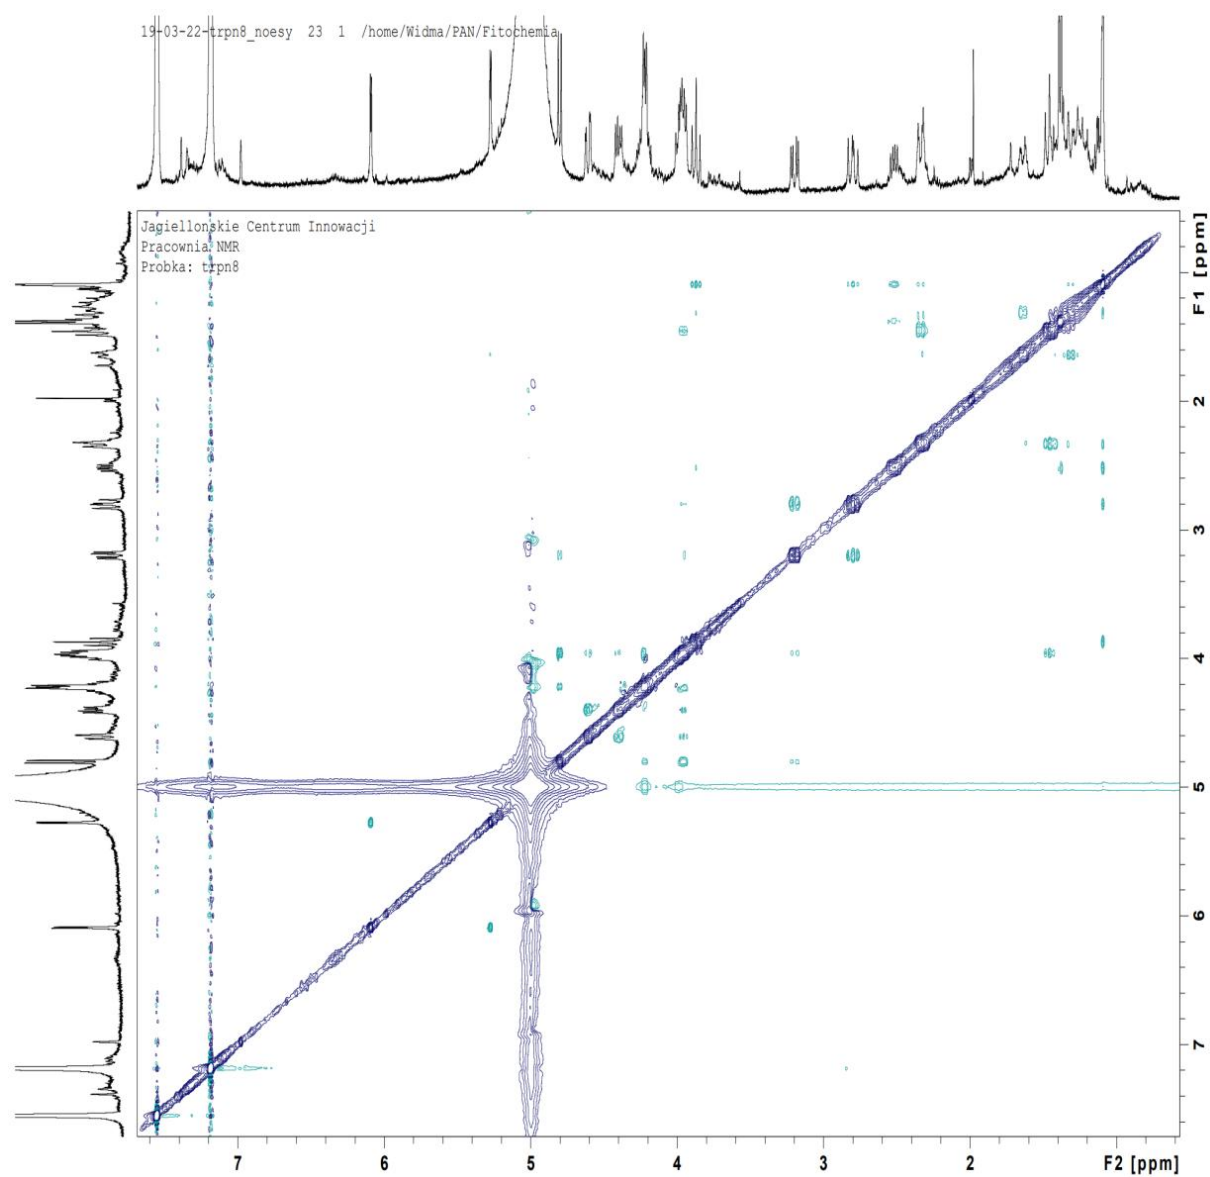

**Figure S7.** NOESY spectrum of compound **1**.

Jagiellonskie Centrum Innowacji  
Pracownia NMR  
Probka: TPrN8

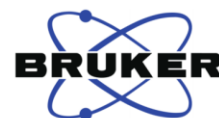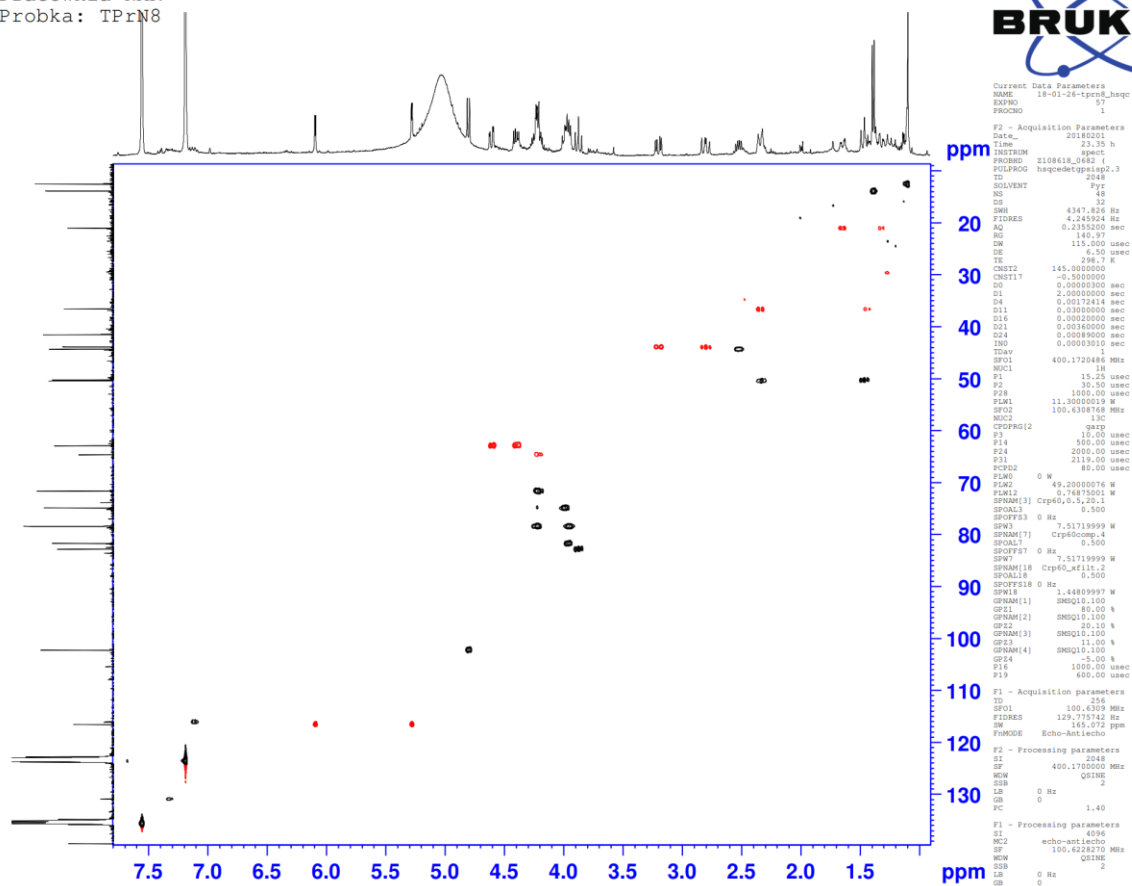

Figure S8. HSQC spectrum of compound 1.

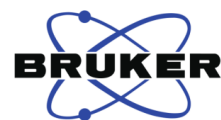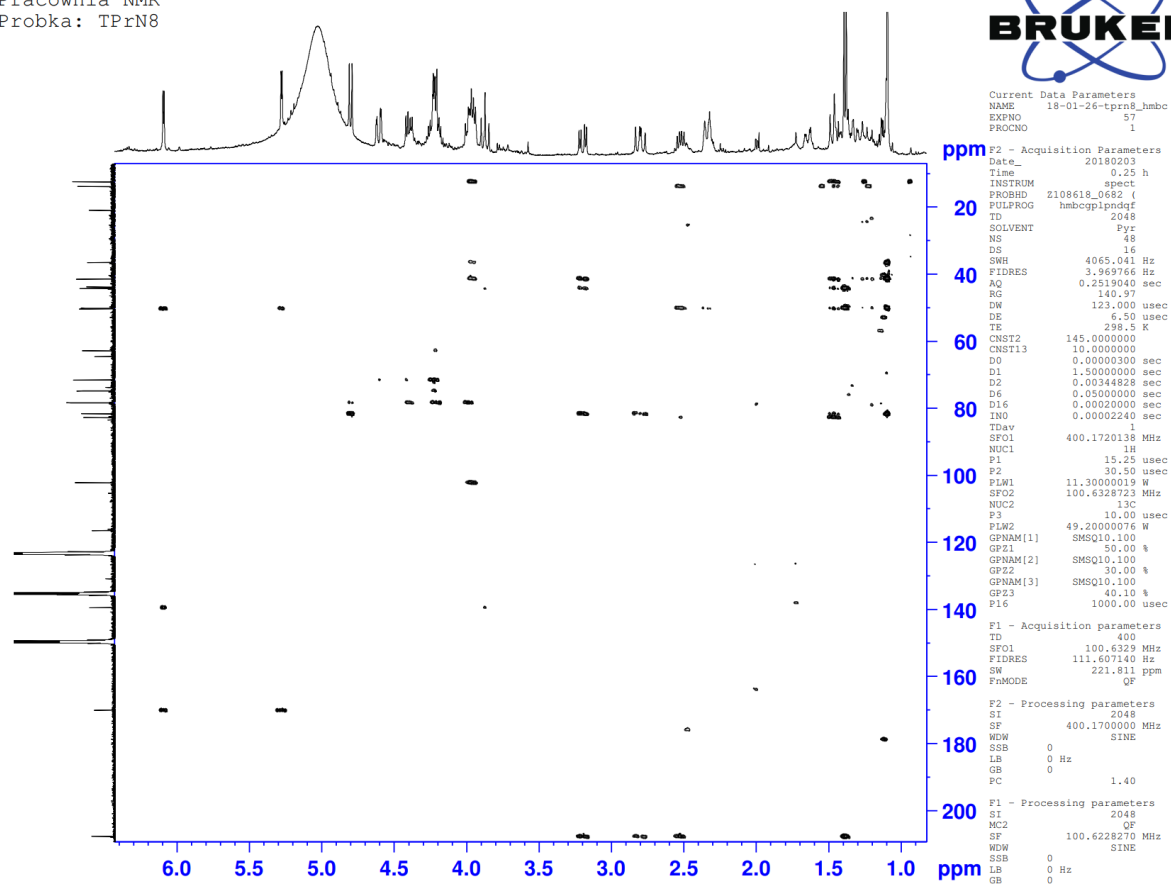

**Figure S9.** HMBC spectrum of compound **1**.
